# Supplementary material for: Perspectives for Combining Viral Oncolysis With Additional Immunotherapies for the Treatment of Melanoma
Source: PubMed Central journal article supplement (PMC9048901; doi:10.3389/fmolb.2022.777775), 2022-04-14
Supplement: Table1.pdf [file Table1.pdf]

**Table S1. References for timeline.**

| <b>Year</b> | <b>Event</b>                                                                          | <b>Citation</b>                       |
|-------------|---------------------------------------------------------------------------------------|---------------------------------------|
| 1910        | Discovery of RSV by Peyton Rous                                                       | (Rous, 1910)                          |
| 1925        | Experimental infection with HSV                                                       | (Goodpasture, 1925)                   |
| 1953        | Discovery of HAdV by Wallace Rowe                                                     | (Rowe et al., 1953)                   |
| 1970        | Demonstration of RSV genome integration in mammalian cells by Howard Temin            | (Temin and Mizutani, 1970)            |
| 1972        | First artificial bacterial transformation by Stanley Cohen                            | (Cohen et al., 1972)                  |
| 1983        | Retrovirus gene transfer into mouse hematopoietic cells                               | (Joyner et al., 1983)                 |
| 1984        | Association between HIV infection and AIDS                                            | (Broder and Gallo, 1984) <sup>a</sup> |
| 1990        | Gene transfer into human lymphocytes using retroviral vector by Steven Rosenberg      | (Rosenberg et al., 1990)              |
| 1995        | Treatment for cystic fibrosis using adenovirus vectors containing the human CFTR cDNA | (Korst et al., 1995)                  |
| 1995        | T lymphocyte-directed gene therapy for ADA-SCID using retroviral vectors              | (Blaese et al., 1995)                 |

|      |                                                                                                                                                                                                                                                                                                                                                                                                     |                                |
|------|-----------------------------------------------------------------------------------------------------------------------------------------------------------------------------------------------------------------------------------------------------------------------------------------------------------------------------------------------------------------------------------------------------|--------------------------------|
|      |                                                                                                                                                                                                                                                                                                                                                                                                     |                                |
| 1996 | Trial for cystic fibrosis using recombinant AAV.                                                                                                                                                                                                                                                                                                                                                    | (Flotte et al., 1996)          |
| 2001 | Phase 1 clinical trial for HIV infection using HIV-based lentiviral vector.                                                                                                                                                                                                                                                                                                                         | (MacGregor, 2001)              |
| 2003 | Clinical trial for chronic pain using HSV-based vectors                                                                                                                                                                                                                                                                                                                                             | (Glorioso et al., 2003)        |
| 2004 | Approval of Gendicine (Ad-p53) for the treatment of head and neck cancers in China                                                                                                                                                                                                                                                                                                                  | (Pearson et al., 2004)         |
| 2005 | Approval of Oncorine, an oncolytic adenoviral vector, for treatment of NPC in China                                                                                                                                                                                                                                                                                                                 | (Liang, 2018)                  |
| 2016 | Approval from the US FDA of T-VEC, the first HSV-based oncolytic virotherapy for melanoma treatment                                                                                                                                                                                                                                                                                                 | (Greig, 2016)                  |
| 2017 | Approval from the FDA of two CAR T immunotherapies, involving lentiviral and retroviral vectors, for hematologic malignancies                                                                                                                                                                                                                                                                       | (Ledford, 2017)                |
| 2017 | Approval from the EMA of Strimvelis, an HSC gene therapy using a retroviral vector, for ADA-SCID treatment                                                                                                                                                                                                                                                                                          | (Aiuti et al., 2017)           |
| 2018 | Approval from the US FDA of Luxturna, a recombinant AAV, for retinal dystrophy treatment                                                                                                                                                                                                                                                                                                            | (Ameri, 2018)                  |
| 2019 | Approval from the FDA of the AAV vector-based Zolgensma, the first gene therapy for SMA treatment                                                                                                                                                                                                                                                                                                   | (Hoy, 2019)                    |
| 2020 | Approval from the EMA of Zynteglo, a lentiviral vector for treatment of transfusion-dependent $\beta$ -thalassemia                                                                                                                                                                                                                                                                                  | (Schuessler-Lenz et al., 2020) |
| 2020 | Publication of Resolution No. 338/2020 by ANVISA approving the registration and marketing of advanced therapy products in Brazil ( <a href="https://www.in.gov.br/en/web/dou/-/resolucao-da-diretoria-colegiada-rdc-n-338-de-20-de-fevereiro-de-2020-244803291">https://www.in.gov.br/en/web/dou/-/resolucao-da-diretoria-colegiada-rdc-n-338-de-20-de-fevereiro-de-2020-244803291</a> )            |                                |
| 2022 | Approval from ANVISA of Kymriah, a CD19-specific CAR T cell therapy for the treatment of DLBCL and B-cell ALL ( <a href="https://www.gov.br/anvisa/pt-br/assuntos/noticias-anvisa/2022/anvisa-aprova-produto-de-terapia-avancada-para-tratamento-de-cancer">https://www.gov.br/anvisa/pt-br/assuntos/noticias-anvisa/2022/anvisa-aprova-produto-de-terapia-avancada-para-tratamento-de-cancer</a> ) |                                |

a, At the time, the HIV virus was known as HTLV-III.

RSV, Rous Sarcoma Virus; HSV, Herpes Simplex Virus; HAdV, Human adenovirus; HIV, Human Immunodeficiency Virus; AIDS, Acquired Immunodeficiency Syndrome; ADA-SCID, Adenosine Deaminase Severe Combined Immunodeficiency; CFTR, Cystic Fibrosis Transmembrane Conductance Regulator; AAV, Adeno-Associated Virus; NPC, nasopharyngeal carcinoma; US FDA, The United States Food and Drug Administration; EMA, European Medicines Agency; CAR, Chimeric Antigen Receptor; SMA, Spinal Muscular Atrophy; ANVISA, Agência Nacional de Vigilância Sanitária (National Agency for Sanitary Vigilance, the federal body in Brazil that regulates new drugs, among other health related items); DLBCL, Diffuse Large B-Cell Lymphoma; ALL, Acute Lymphoblastic Leukemia.

## References

- Aiuti, A., Roncarolo, M.G., and Naldini, L. (2017). Gene therapy for ADA-SCID, the first marketing approval of an ex vivo gene therapy in Europe: paving the road for the next generation of advanced therapy medicinal products. *EMBO molecular medicine* 9, 737-740.
- Ameri, H. (2018). Prospect of retinal gene therapy following commercialization of voretigene neparvovec-rzyl for retinal dystrophy mediated by RPE65 mutation. *Journal of current ophthalmology* 30, 1-2.
- Blaese, R.M., Culver, K.W., Miller, A.D., Carter, C.S., Fleisher, T., Clerici, M., Shearer, G., Chang, L., Chiang, Y., Tolstoshev, P., Greenblatt, J.J., Rosenberg, S.A., Klein, H., Berger, M., Mullen, C.A., Ramsey, W.J., Muul, L., Morgan, R.A., and Anderson, W.F. (1995). T lymphocyte-directed gene therapy for ADA- SCID: initial trial results after 4 years. *Science* 270, 475-480.
- Broder, S., and Gallo, R.C. (1984). A pathogenic retrovirus (HTLV-III) linked to AIDS. *The New England journal of medicine* 311, 1292-1297.
- Cohen, S.N., Chang, A.C., and Hsu, L. (1972). Nonchromosomal antibiotic resistance in bacteria: genetic transformation of *Escherichia coli* by R-factor DNA. *Proc Natl Acad Sci U S A* 69, 2110-2114.
- Flotte, T., Carter, B., Conrad, C., Guggino, W., Reynolds, T., Rosenstein, B., Taylor, G., Walden, S., and Wetzel, R. (1996). A phase I study of an adeno-associated virus-CFTR gene vector in adult CF patients with mild lung disease. *Hum Gene Ther* 7, 1145-1159.
- Glorioso, J.C., Mata, M., and Fink, D.J. (2003). Gene therapy for chronic pain. *Curr Opin Mol Ther* 5, 483-488.
- Goodpasture, E.W. (1925). The Axis-Cylinders of Peripheral Nerves as Portals of Entry to the Central Nervous System for the Virus of Herpes Simplex in Experimentally Infected Rabbits. *Am J Pathol* 1, 11-28.15.
- Greig, S.L. (2016). Talimogene Laherparepvec: First Global Approval. *Drugs* 76, 147-154.
- Hoy, S.M. (2019). Onasemnogene Apeparvovec: First Global Approval. *Drugs* 79, 1255-1262.
- Joyner, A., Keller, G., Phillips, R.A., and Bernstein, A. (1983). Retrovirus transfer of a bacterial gene into mouse haematopoietic progenitor cells. *Nature* 305, 556-558.
- Korst, R.J., Mcelvaney, N.G., Chu, C.-S., Rosenfeld, M.A., Mastrangeli, A., Hay, J., Brody, S.L., Eissa, N.T., Danel, C., Jaffe, H.A., and Crystal, R.G. (1995). Gene Therapy for the Respiratory

- Manifestations of Cystic Fibrosis. *American Journal of Respiratory and Critical Care Medicine* 151, S75-S87.
- Ledford, H. (2017). Engineered cell therapy for cancer gets thumbs up from FDA advisers. *Nature News* 547, 270.
- Liang, M. (2018). Oncorine, the World First Oncolytic Virus Medicine and its Update in China. *Curr Cancer Drug Targets* 18, 171-176.
- Macgregor, R.R. (2001). Clinical protocol. A phase 1 open-label clinical trial of the safety and tolerability of single escalating doses of autologous CD4 T cells transduced with VRX496 in HIV-positive subjects. *Hum Gene Ther* 12, 2028-2029.
- Pearson, S., Jia, H., and Kandachi, K. (2004). China approves first gene therapy. *Nature Biotechnology* 22, 3-4.
- Rosenberg, S.A., Aebersold, P., Cornetta, K., Kasid, A., Morgan, R.A., Moen, R., Karson, E.M., Lotze, M.T., Yang, J.C., Topalian, S.L., and Et Al. (1990). Gene transfer into humans-- immunotherapy of patients with advanced melanoma, using tumor-infiltrating lymphocytes modified by retroviral gene transduction. *N Engl J Med* 323, 570-578.
- Rous, P. (1910). A TRANSMISSIBLE AVIAN NEOPLASM. (SARCOMA OF THE COMMON FOWL.). *J Exp Med* 12, 696-705.
- Rowe, W.P., Huebner, R.J., Gilmore, L.K., Parrott, R.H., and Ward, T.G. (1953). Isolation of a cytopathogenic agent from human adenoids undergoing spontaneous degeneration in tissue culture. *Proc Soc Exp Biol Med* 84, 570-573.
- Schuessler-Lenz, M., Enzmann, H., and Vamvakas, S. (2020). Regulators' Advice Can Make a Difference: European Medicines Agency Approval of Zynteglo for Beta Thalassemia. *Clinical pharmacology and therapeutics* 107, 492-494.
- Temin, H.M., and Mizutani, S. (1970). RNA-dependent DNA polymerase in virions of Rous sarcoma virus. *Nature* 226, 1211-1213.
